# Supplementary material for: Regular Black Bean Consumption Is Necessary to Sustain Improvements in Small-Artery Vascular Compliance in the Spontaneously Hypertensive Rat
Source: PubMed Central journal article supplement (PMC7146454; doi:10.3390/nu12030685), 2020-03-03
Supplement: nutrients-12-00685-s001.pdf [file nutrients-12-00685-s001.pdf]

**Table S1.** Proximate composition of beans<sup>1</sup> and experimental diets.

| <b>Proximate Analysis<br/>(g/100 g DW)</b> | <b>Analytical Method</b> | <b>Control Diet</b> | <b>Navy Bean Diet</b> | <b>Black Bean Diet</b> | <b>Navy Bean Powder</b> | <b>Black Bean Powder</b> |
|--------------------------------------------|--------------------------|---------------------|-----------------------|------------------------|-------------------------|--------------------------|
| <b>Crude protein</b>                       | AOAC 990.3               | 16.8                | 17.8                  | 16.5                   | 24.0                    | 22.8                     |
| <b>Crude fibre</b>                         | AOCS Ba6a-05             | 1.04                | 3.51                  | 3.04                   | 5.4                     | 4.9                      |
| <b>Non-fibre carbohydrate</b>              | n/a                      | 65.7                | 64.4                  | 64.0                   | 64.8                    | 66.7                     |
| <b>Fat</b>                                 | AOCS Am 5-04             | 6.89                | 7.04                  | 7.76                   | 2.48                    | 2.18                     |
| <b>Ash</b>                                 | AOAC 923.03              | 2.39                | 3.19                  | 3.25                   | 2.40                    | 2.45                     |
| <b>Energy (kcal/g)</b>                     | n/a                      | 3.92                | 3.92                  | 3.92                   | 3.77                    | 3.77                     |

Determinations based on dry weight of material. Proximate analysis was conducted by Central Testing Labs Ltd. (Winnipeg, MB, Canada). Proximate analyses without an analytical method were determined by calculation. <sup>1</sup>Analysis conducted on lyophilized, milled bean powders. *Abbreviations:* AOAC, Association of Official Analytical Chemists; AOCS, American Oil Chemist Society; DW, dry weight.
